# Supplementary material for: Prognostic Factors Influencing Survival Outcomes in Renal Cell Carcinoma Patients Aged ≥75 Years: A Single-Center Retrospective Cohort Analysis
Source: Research Square preprint supplement (doi:10.21203/rs.3.rs-6970338/v1), 2025-10-20
Supplement: Supplementary file 1 [file 373449750055bc32cefb4ffb.docx]

| 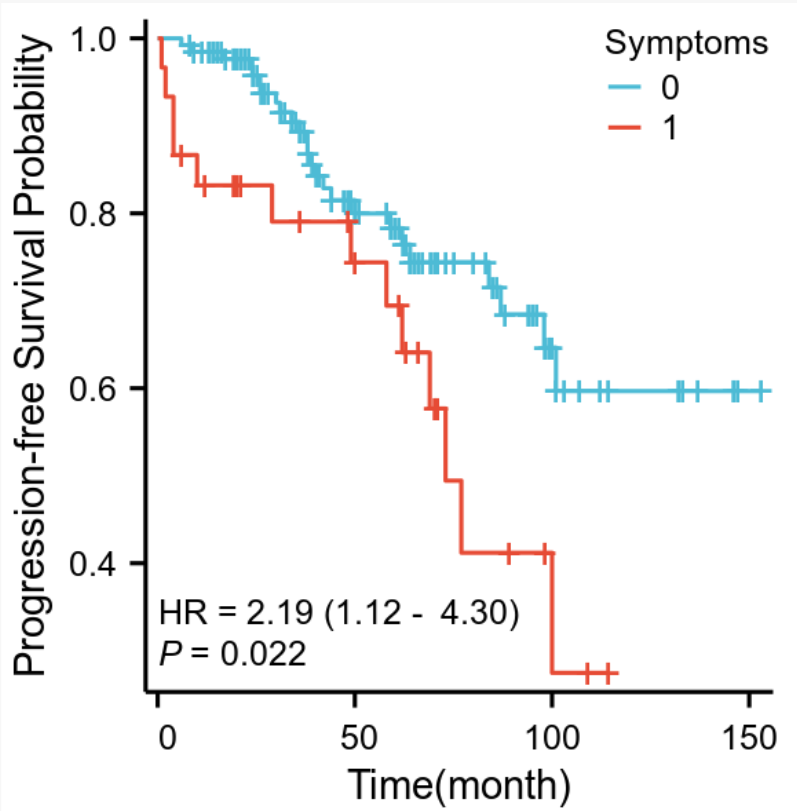  **A** | 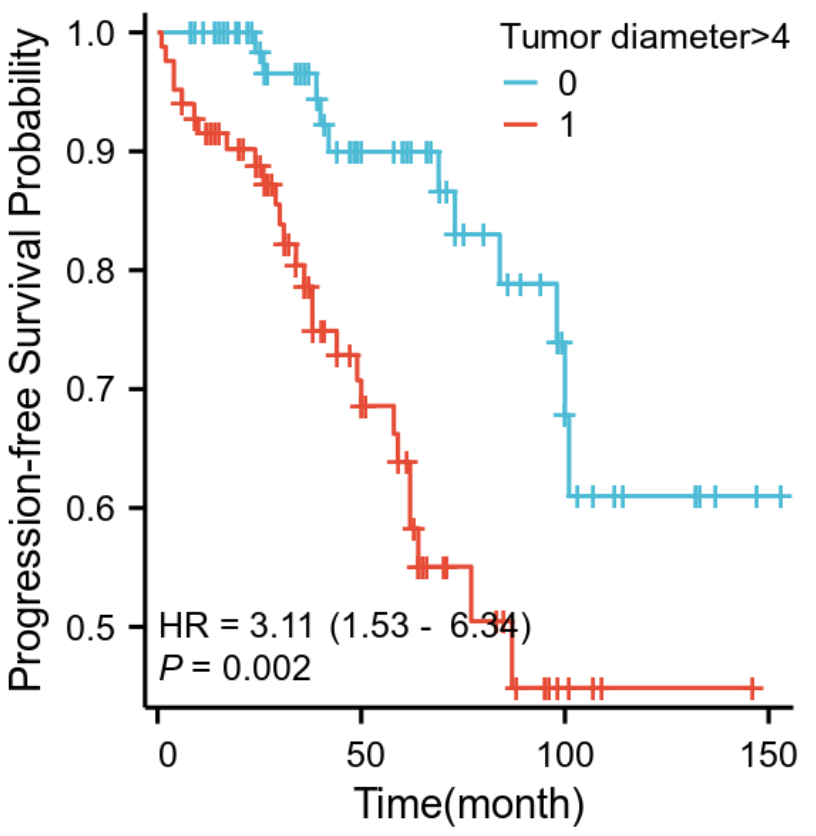  **B** |
| --- | --- |
| 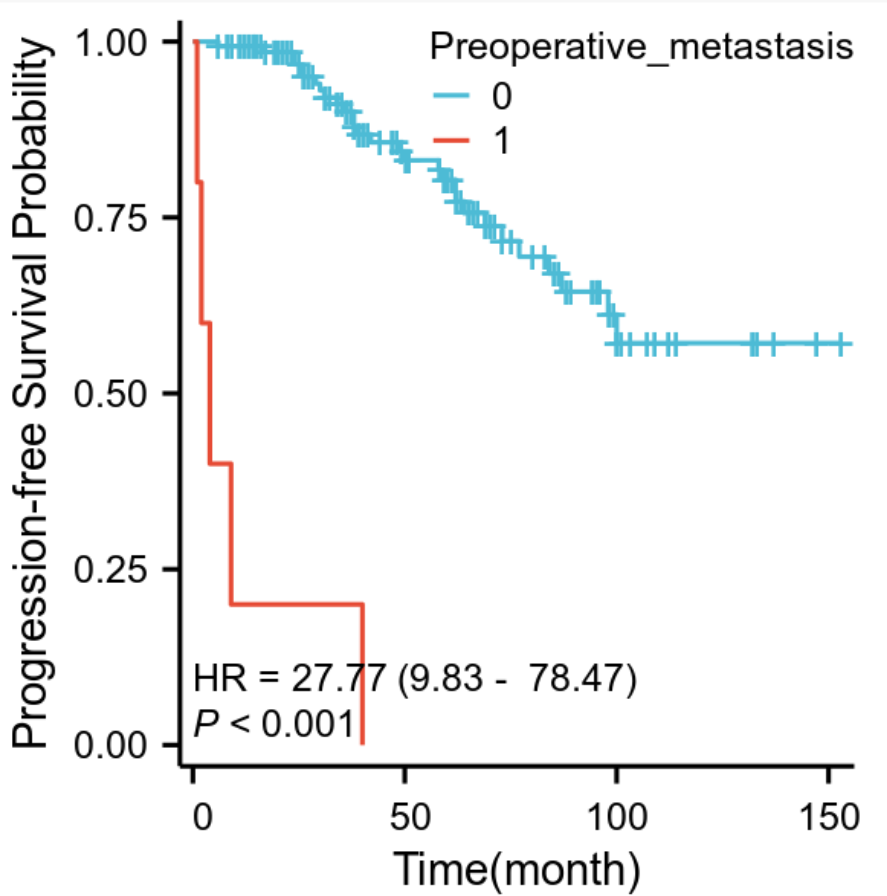  **C** | 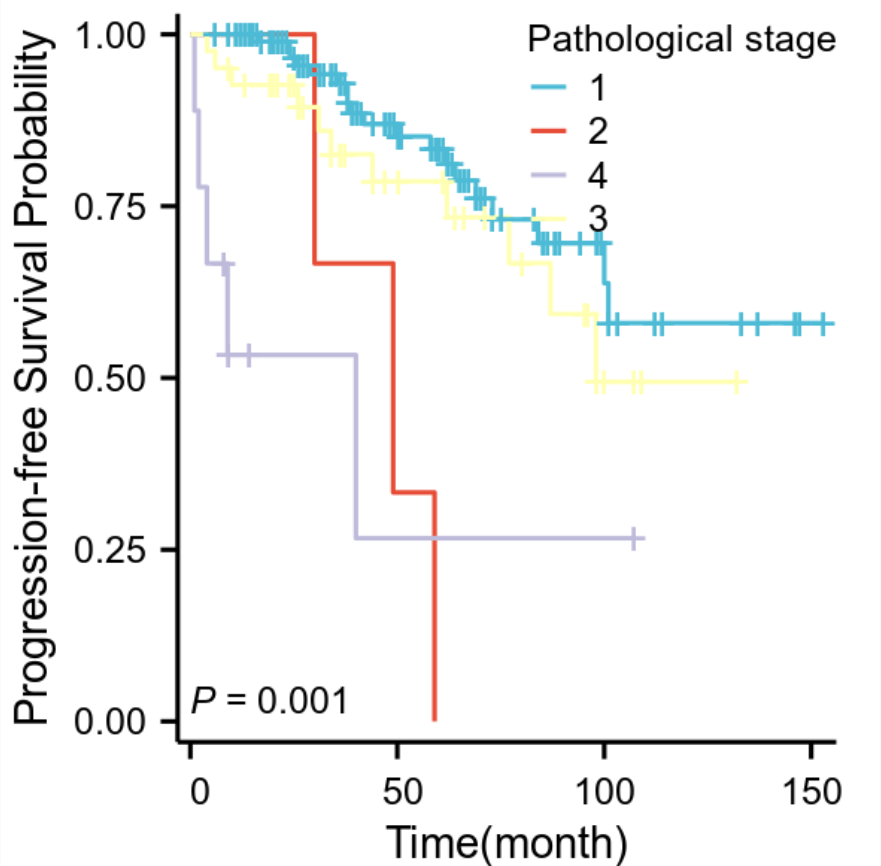  **D** |
| **Supplementary Figure 1.**  Kaplan–Meier survival curve in PFS of elderly adults with renal cell carcinoma divided **A** by pathological stage, **B** by tumor diameter, **C** by preoperative metastasis and **D** by pathological stage  **A** A statistically significant difference in PFS was observed between symptomatic and asymptomatic patient groups (p=0.022). **B** Similarly, patients with tumor diameter >4 cm demonstrated significantly worse PFS (p=0.002). **C** Furthermore, patients with preoperative metastases demonstrated significantly worse PFS (p<0.001). **D** Lastly, a significant difference in PFS was observed among different pathological stages (p=0.001) | |
